# Supplementary material for: Enhanced charge–discharge properties of SnO2 nanocrystallites in confined carbon nanospace
Source: Royal Society of Chemistry journal article supplement (doi:10.1039/c4cc02716g), 2014-01-01
Supplement: c4cc02716g1.pdf [file c4cc02716g1.pdf]

Electronic Supplementary Material (ESI) for Chemical Communications

## **Enhanced Charge-Discharge Properties of SnO<sub>2</sub> Nanocrystallites in Confined Carbon Nanospace**

Shinji Oro, Koki Urita and Isamu Moriguchi\*

Graduate School of Engineering, Nagasaki University, 1-14 Bunkyo-machi, Nagasaki 852-  
8521, JAPAN

### **Supplementary Materials**

#### **Experimental details**

**Fig. S1** XRD patterns of samples.

**Fig. S2** SEM images of (a) C45, (b) SnO<sub>2</sub>/C45-vap, and (c) the surface of a SnO<sub>2</sub>/C45-vap electrode pressed with PVdF.

**Fig. S3** Initial charge-discharge curves of SnO<sub>2</sub>/C120 samples and SnO<sub>2</sub>·AB.

**Fig. S4** Initial charge-discharge curves and cycle performance of CXs.

**Fig. S5** Change of Coulombic efficiency with cycling.

**Fig. S6** Rate capability of SnO<sub>2</sub>·AB and SnO<sub>2</sub>/C120-vap.

**Fig. S7** Cycle performance of SnO<sub>2</sub>/C18-vap up to 100 cycles.

## Experimental details

**Synthesis:** A porous carbon with an average pore diameter ( $X$ ) of 120 nm, 45 nm or 18 nm, which was denoted as  $CX$ , was obtained by a silica opal template process as previously reported.<sup>22</sup>  $\text{SnO}_2$ -embedded porous carbon composites ( $\text{SnO}_2/CX$ s) were synthesized by following two methods: (1) mixing of  $CX$  with a  $\text{SnO}_2$  sol in a solution, (2) introduction of  $\text{SnCl}_2$  vapor and conversion into  $\text{SnO}_2$  in  $CX$ . As for the method (1), a  $\text{SnO}_2 \cdot n\text{H}_2\text{O}$  sol was first prepared by dropwise addition of aqueous  $\text{NH}_4\text{OH}$  to aqueous  $\text{SnCl}_2$  under stirring until the pH reached at 9.7, washing with pure water and drying at room temperature for overnight. The obtained gel was dissolved in ethanol and was mixed under sonication for 6 h with C120, of which mixing ratio was  $\text{SnO}_2 \cdot n\text{H}_2\text{O}/\text{C120} = 85/15$  by weight. The filtrated material was heated at 120 °C for 2 h. On the other hand, the method (2) was carried out by heating a mixture of  $\text{SnCl}_2$  and  $CX$  with the weight ratio of  $\text{SnCl}_2 / CX = 85/15$  in a sealed tube at 320 °C for 25 h. The  $CX$  used was preheated at 120 °C for 2 h under vacuum to remove adsorbed water. 400 mg of the mixed sample obtained above was dispersed in 600 mL of pure water and was filtered off to remove unreacted  $\text{SnCl}_2$ , and then was dried in *vacuo* for overnight.  $\text{SnO}_2$  powder were also synthesized by heating the  $\text{SnO}_2 \cdot n\text{H}_2\text{O}$  sol at 500 °C for 2 h in an  $\text{O}_2$  atmosphere.

**Instrumental Analysis:** X-ray diffraction (XRD) patterns of samples were obtained on a Rigaku RINT-2200 diffractometer using  $\text{Cu K}\alpha$  radiation. The  $\text{SnO}_2$  content in samples was estimated by thermogravimetric analysis (TGA, SEIKO Instrument Inc, TG/DTA7300). The specific surface area was determined by  $\alpha_s$ -plot analysis from the  $\text{N}_2$  adsorption isotherm (BEL Japan Inc, BELSORP-max). The morphology of samples was observed by transmission electron microscopy (TEM, JEOL JEM-2010UHR) and scanning electron microscopy (SEM, JEOL JSM-7500FAM). Electrochemical charge-discharge curves were measured on an electrochemical analyzer (Hokuto Denko, HJ-SM8) using a beaker-type three-electrode cell with metallic Li as a counter and reference electrode at room temperature. The electrolyte

used was a  $1.0 \text{ mol dm}^{-3}$  solution of  $\text{LiPF}_6$  in ethylene carbonate/dimethyl carbonate (1/1 by volume). A mixture of  $\text{SnO}_2/\text{CX}$  sample and poly(vinylidene difluoride) (PVdF) with the weight ratio of 90 : 1 were pressed on Ni mesh, and then were used as working electrodes. For the  $\text{SnO}_2$  powder, 10 wt% of acetylene black (AB) was mixed as a conductive additive in the preparation of working electrode ( $\text{SnO}_2 : \text{AB} : \text{PVdF} = 80 : 10 : 10$  by weight). To minimize the effect of IR drop associated with the electrolyte resistance, the tip of a capillary in connection to the reference electrode was placed as close as possible to the working electrode. A constant current (CC) mode charging-discharging was carried out at the current density of  $50 \text{ mA g}^{-1}$  in the potential range of  $0.01 \text{ V} - 2.0 \text{ V}$  vs.  $\text{Li}^+/\text{Li}$  after the initial discharging from open circuit voltage to  $0.01 \text{ V}$ . Rate capability was evaluated in the range of  $50 - 1000 \text{ mAh g}^{-1}$ . Cyclic voltammetry (CV) was carried out on a potentiostat/galvanostat (Solartron Analytical Inc. S1287) at a scan rate of  $0.2 \text{ mV/s}$  in the potential range of  $0.01 - 3.0 \text{ V}$  vs.  $\text{Li}^+/\text{Li}$ . Rate

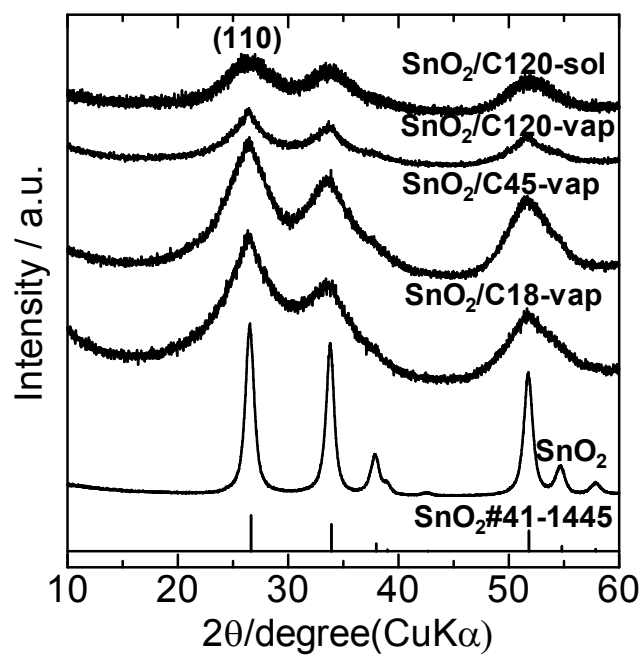

Fig. S1 XRD patterns of the samples.

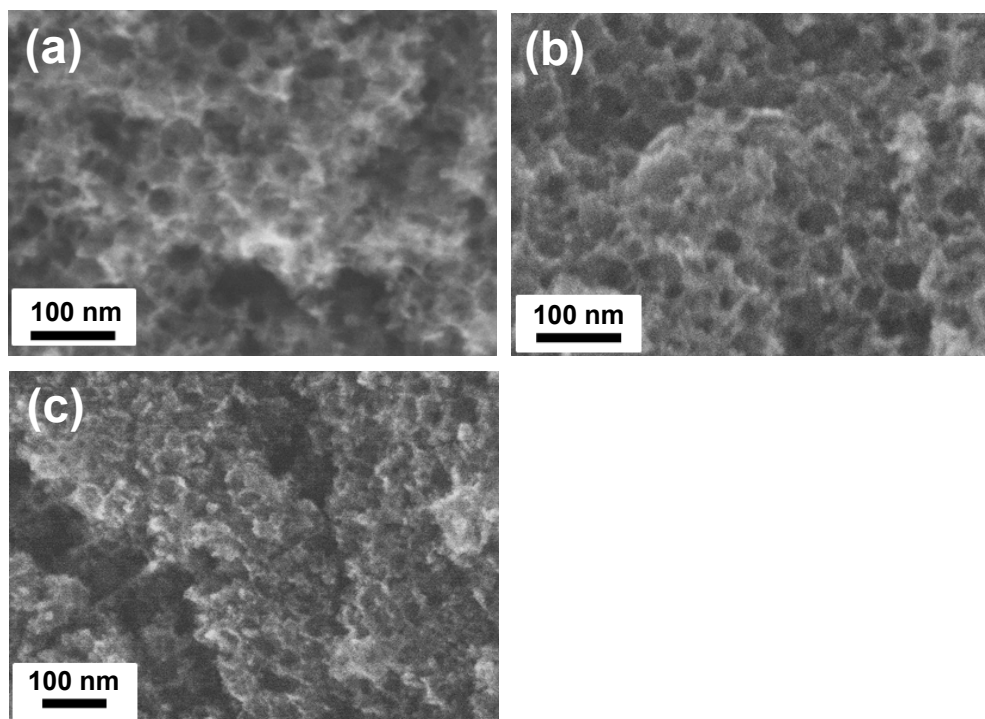

Fig. S2 SEM images of (a) C45, (b) SnO<sub>2</sub>/C45-vap, and (c) the surface of a SnO<sub>2</sub>/C45-vap electrode pressed with PVdF.

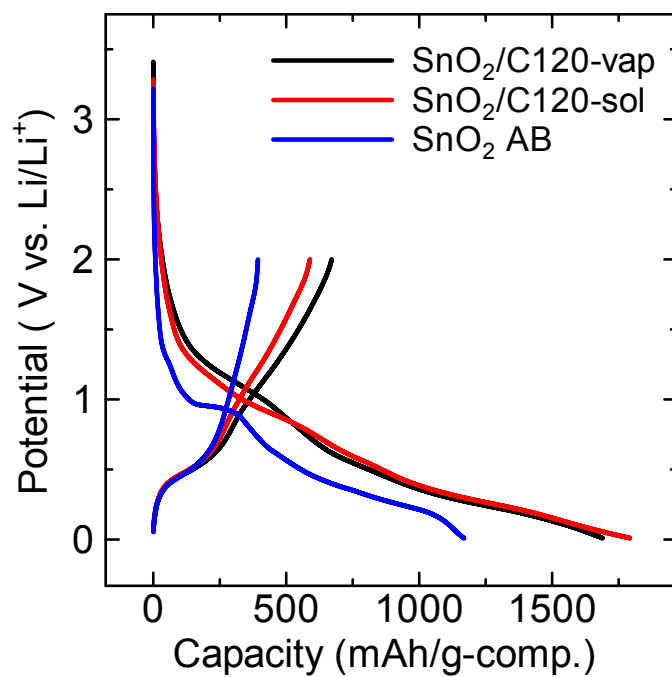

**Fig. S3** Initial charge-discharge curves of SnO<sub>2</sub>/C120 samples and SnO<sub>2</sub>·AB.

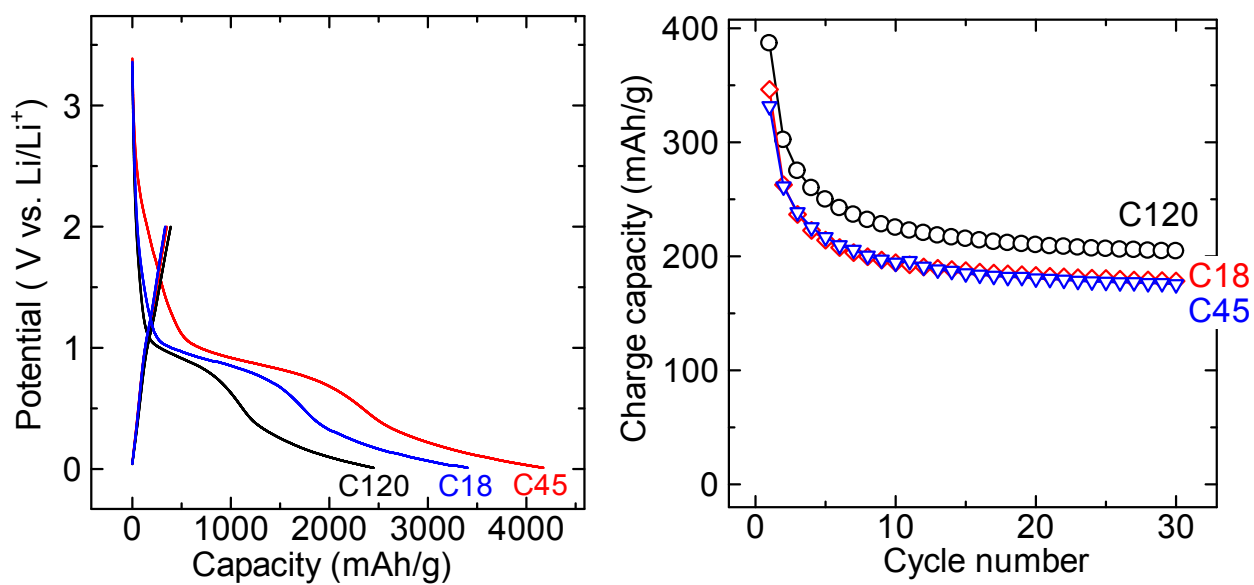

**Fig. S4** Initial charge-discharge curves and cycle performance of CXs.

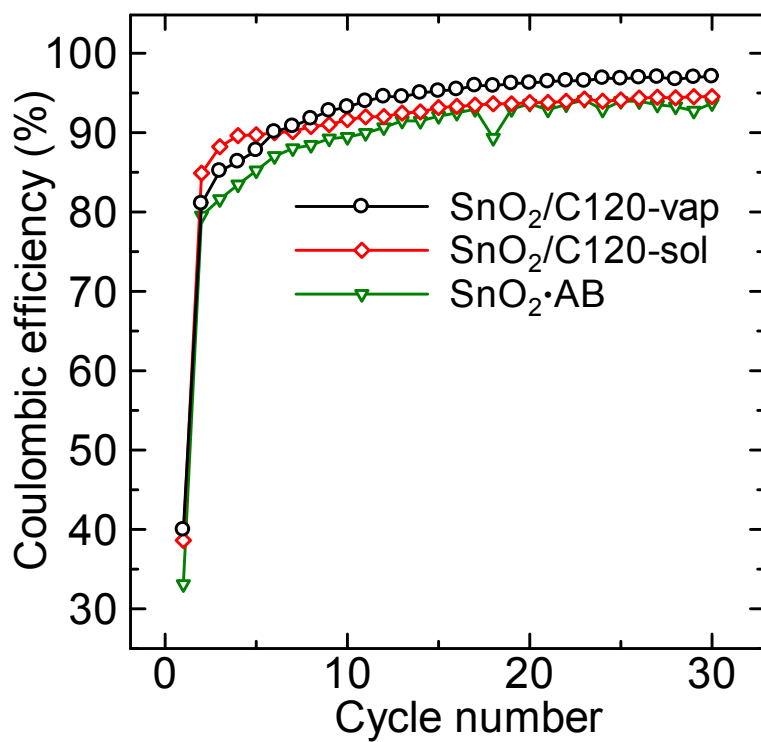

Fig. S5 Change of Coulombic efficiency with cycling.

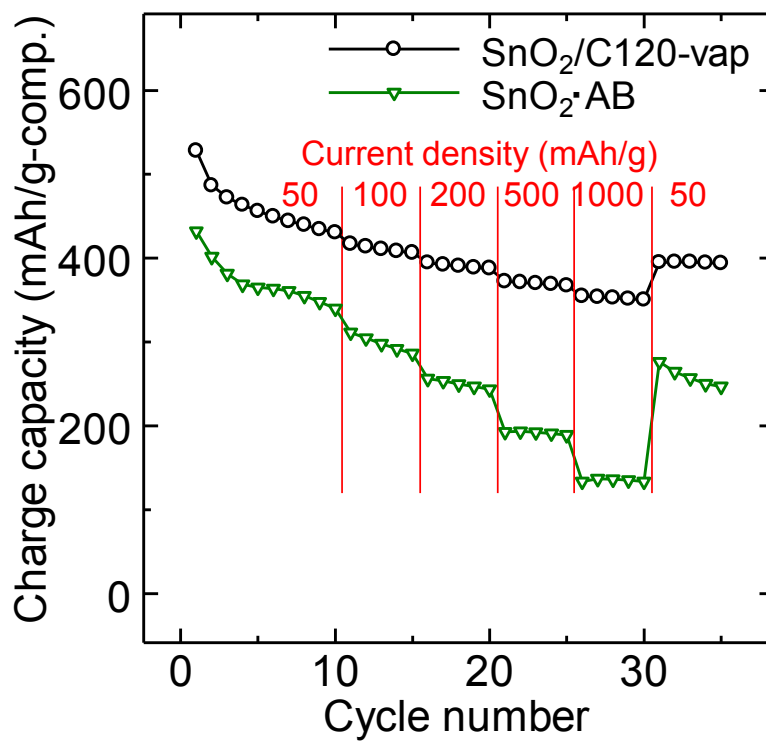

Fig. S6 Rate capability of SnO<sub>2</sub>·AB and SnO<sub>2</sub>/C120-vap.

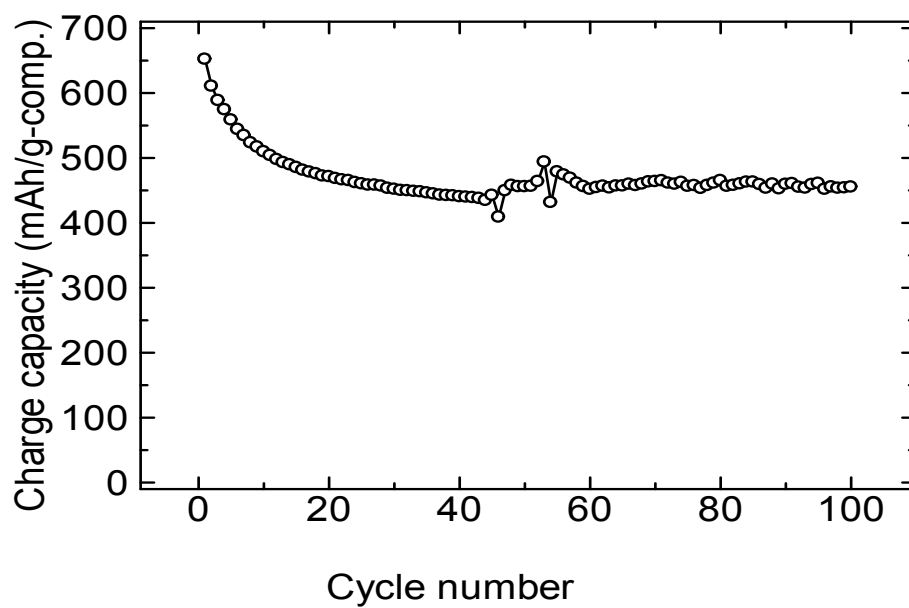

**Fig. S7** Cycle performance of SnO<sub>2</sub>/C18-vap up to 100 cycles.
